# Supplementary material
Source: publisher figshare collection journal article supplement (https://acs.figshare.com/ndownloader/files/14886653)
Supplement: Supplementary file 1 [file 14886653]

**Identification of Pyrrolo[2,3-*d*]pyrimidine-based Derivatives as Potent and  
Orally Effective Fms-like Tyrosine Receptor Kinase 3 (FLT3) Inhibitors for  
Treating Acute Myelogenous Leukemia**

Xue Yuan<sup>a,§</sup>, Yong Chen<sup>a,§</sup>, Wanhua Zhang<sup>b,§</sup>, Jun He<sup>a,§</sup>, Lei Lei<sup>a</sup>, Minghai Tang<sup>a</sup>,  
Jiang Liu<sup>a</sup>, Muzhou Li<sup>a</sup>, Caixia Dou<sup>a</sup>, Tao Yang<sup>a</sup>, Linyu Yang<sup>a</sup>, Shengyong Yang<sup>a</sup>,  
Yuquan Wei<sup>a</sup>, Aihua Peng<sup>a</sup>, Ting Niu<sup>b</sup>, Mingli Xiang<sup>a</sup>, Haoyu Ye <sup>a,\*</sup>, and Lijuan  
Chen<sup>a,\*</sup>

<sup>a</sup> State Key Laboratory of Biotherapy and Cancer Center, National Clinical Research  
Center for Geriatrics; <sup>b</sup> Department of Hematology and Research Laboratory of  
Hematology, West China Hospital of Sichuan University, Chengdu, 610041, China.

<sup>§</sup> These authors contributed equally and should be considered as co-first authors

## LIST OF CONTENTS

|                                                                                                              |             |
|--------------------------------------------------------------------------------------------------------------|-------------|
| <b>Table S1</b> Kinome Wide Selectivity Profiling of Compound <b>9u</b> .....                                | Page S3-11  |
| <b>Table S2</b> IC <sub>50</sub> Values of Compounds <b>9a-ae</b> and <b>13a-h</b> in RS4;11 Cell.....       | Page S11-12 |
| <b>Table S3</b> Inhibitory Rate of Compounds <b>9a-ae</b> and <b>13a-h</b> in HL-60 Cell                     | Page S12-13 |
| <b>Table S4</b> IC <sub>50</sub> Values against Hit Target Kinases of <b>9u</b> .....                        | Page S13    |
| <b>Figure S1</b> Bioavailability Radar Chart from <i>swissADME</i> Online Web Tool for Tested Compounds..... | Page S15    |
| <b>Figure S2</b> Predicted Boiled-Egg plot from <i>swissADME</i> Online Web Tool for Tested Compounds.....   | Page S15    |
| <b>Biological Assay Methods</b> .....                                                                        | Page S16-21 |

**Table S1.** Kinome Wide Selectivity Profiling of Compound **9u**

| Kinase             | Kinase family  | Percent control (%)<br>@0.1 $\mu$ M | Kinase              | Kinase family | Percent control (%)<br>@ 0.1 $\mu$ M |
|--------------------|----------------|-------------------------------------|---------------------|---------------|--------------------------------------|
| AAK1(h)            | MISC           | 96                                  | Aurora-B(h)         | MISC          | 4                                    |
| Abl(h)             | TK             | 35                                  | Aurora-C(h)         | MISC          | 50                                   |
| Abl(H396P)(h)      | TK             | 37                                  | Axl(h)              | TK            | 12                                   |
| Abl(M351T)(h)      | TK             | 46                                  | BIKe(h)             | MISC          | 95                                   |
| Abl(Q252H)(h)      | TK             | 15                                  | Blk(h)              | TK            | 18                                   |
| Abl(T315I)(h)      | TK             | 9                                   | Blk(m)              | TK            | 9                                    |
| Abl(Y253F)(h)      | TK             | 16                                  | BMPR2(h)            | TKL           | 89                                   |
| ACK1(h)            | TK             | 70                                  | Bmx(h)              | TK            | 26                                   |
| ACTR2(h)           | TKL            | 108                                 | B-Raf(h)            | TKL           | 33                                   |
| ALK(h)             | TK             | 14                                  | B-Raf(V599E)(h)     | TKL           | 22                                   |
| ALK1(h)            | TKL            | 100                                 | BRK(h)              | TK            | 57                                   |
| ALK2(h)            | TKL            | 101                                 | BrSK1(h)            | CAMK          | 89                                   |
| ALK4(h)            | TKL            | 104                                 | BrSK2(h)            | CAMK          | 89                                   |
| ALK6(h)            | TKL            | 103                                 | BTK(h)              | TK            | 45                                   |
| AMPK $\alpha$ 1(h) | CAMK           | 95                                  | BTK(R28H)(h)        | TK            | 91                                   |
| AMPK $\alpha$ 2(h) | CAMK           | 85                                  | CaMKI(h)            | CAMK          | 74                                   |
| A-Raf(h)           | TKL            | 47                                  | CaMKIb(h)           | CAMK          | 68                                   |
| Arg(h)             | TK             | 18                                  | CaMKII $\alpha$ (h) | CAMK          | 97                                   |
| Arg(m)             | TK             | 20                                  | CaMKII $\beta$ (h)  | CAMK          | 103                                  |
| ARK5(h)            | CAMK           | 113                                 | CaMKII $\gamma$ (h) | CAMK          | 74                                   |
| ASK1(h)            | STE            | 104                                 | CaMKII $\delta$ (h) | CAMK          | 100                                  |
| ATM(h)             | Lipid/Atypical | 92                                  | CaMKIV(h)           | CAMK          | 77                                   |
| ATR/ATRIP(h)       | Lipid/Atypical | 98                                  | CaMKI $\gamma$ (h)  | CAMK          | 91                                   |
| Aurora-A(h)        | MISC           | 15                                  | CaMKI $\delta$ (h)  | CAMK          | 70                                   |

**Table S1. Continued.**

| Kinase               | Kinase family | @0.1 $\mu$ M | Kinase             | Kinase family | @0.1 $\mu$ M |
|----------------------|---------------|--------------|--------------------|---------------|--------------|
| CaMKK1(h)            | MISC          | 51           | CHK1(h)            | CAMK          | 105          |
| CaMKK2(h)            | MISC          | 84           | CHK2(h)            | CAMK          | 60           |
| Cdc7/cyclinB1(h)     | MISC          | 65           | CHK2(I157T)(h)     | CAMK          | 60           |
| CDK1/cyclinB(h)      | CMGC          | 91           | CHK2(R145W)(h)     | CAMK          | 70           |
| CDK12/cyclinK(h)     | CMGC          | 97           | CK1(y)             | CK1           | 101          |
| CDK13/cyclinK(h)     | CMGC          | 106          | CK1 $\gamma$ 1(h)  | CK1           | 109          |
| CDK14/cyclinY(h)     | CMGC          | 21           | CK1 $\gamma$ 2(h)  | CK1           | 100          |
| CDK16/cyclinY(h)     | CMGC          | 98           | CK1 $\gamma$ 3(h)  | CK1           | 108          |
| CDK17/cyclinY(h)     | CMGC          | 25           | CK1 $\delta$ (h)   | CK1           | 92           |
| CDK18/cyclinY(h)     | CMGC          | 62           | CK1 $\epsilon$ (h) | CK1           | 93           |
| CDK2/cyclinA(h)      | CMGC          | 91           | CK2(h)             | CMGC          | 106          |
| CDK2/cyclinE(h)      | CMGC          | 95           | CK2 $\alpha$ 1(h)  | CMGC          | 122          |
| CDK3/cyclinE(h)      | CMGC          | 97           | CK2 $\alpha$ 2(h)  | CMGC          | 107          |
| CDK4/cyclinD3(h)     | CMGC          | 93           | c-Kit (V654A)(h)   | TK            | 44           |
| CDK5/p25(h)          | CMGC          | 109          | c-Kit(D816H)(h)    | TK            | 95           |
| CDK5/p35(h)          | CMGC          | 97           | c-Kit(D816V)(h)    | TK            | 38           |
| CDK6/cyclinD3(h)     | CMGC          | 92           | c-Kit(h)           | TK            | 50           |
| CDK7/cyclinH/MAT1(h) | CMGC          | 104          | c-Kit(V560G)(h)    | TK            | 8            |
| CDK9/cyclinT1(h)     | CMGC          | 72           | CLK1(h)            | MISC          | 61           |
| CDKL1(h)             | CMGC          | 52           | CLK1(h)            | CMGC          | 74           |
| CDKL2(h)             | CMGC          | 61           | CLK2(h)            | CMGC          | 29           |
| CDKL3(h)             | CMGC          | 89           | CLK3(h)            | CMGC          | 64           |
| CDKL4(h)             | CMGC          | 100          | CLK4(h)            | CMGC          | 81           |
| ChaK1(h)             | MISC          | 102          | c-RAF(h)           | TKL           | 29           |

**Table S1. Continued.**

| Kinase                | Kinase family  | @0.1 $\mu$ M | Kinase          | Kinase family | @0.1 $\mu$ M |
|-----------------------|----------------|--------------|-----------------|---------------|--------------|
| CRIK(h)               | AGC            | 109          | EphA2(h)        | TK            | 2            |
| CSK(h)                | TK             | 72           | EphA3(h)        | TK            | 20           |
| cSRC(h)               | TK             | 15           | EphA4(h)        | TK            | 41           |
| DAPK1(h)              | CAMK           | 87           | EphA5(h)        | TK            | 19           |
| DAPK2(h)              | CAMK           | 125          | EphA7(h)        | TK            | 50           |
| DCAMKL2(h)            | CAMK           | 86           | EphA8(h)        | TK            | 14           |
| DCAMKL3(h)            | CAMK           | 75           | EphB1(h)        | TK            | 9            |
| DDR1(h)               | TK             | 17           | EphB2(h)        | TK            | 39           |
| DDR2(h)               | TK             | 33           | EphB3(h)        | TK            | 79           |
| DMPK(h)               | AGC            | 105          | EphB4(h)        | TK            | 22           |
| DNA-PK(h)             | Lipid/Atypical | 76           | ErbB2(h)        | TK            | 87           |
| DRAK1(h)              | CAMK           | 88           | ErbB4(h)        | TK            | 101          |
| DRAK2(h)              | CAMK           | 92           | FAK(h)          | TK            | 38           |
| DYRK1A(h)             | CMGC           | 103          | Fer(h)          | TK            | 63           |
| DYRK1B(h)             | CMGC           | 95           | Fes(h)          | TK            | 41           |
| DYRK2(h)              | CMGC           | 99           | FGFR1(h)        | TK            | 1            |
| DYRK3(h)              | CMGC           | 59           | FGFR1(V561M)(h) | TK            | 2            |
| eEF-2K(h)             | MISC           | 116          | FGFR2(h)        | TK            | 3            |
| EGFR(h)               | TK             | 107          | FGFR2(N549H)(h) | TK            | 1            |
| EGFR(L858R)(h)        | TK             | 75           | FGFR3(h)        | TK            | 6            |
| EGFR(L861Q)(h)        | TK             | 82           | FGFR4(h)        | TK            | 22           |
| EGFR(T790M)(h)        | TK             | 41           | Fgr(h)          | TK            | 20           |
| EGFR(T790M, L858R)(h) | TK             | 34           | Flt1(h)         | TK            | 1            |
| EphA1(h)              | TK             | 34           | Flt3(D835Y)(h)  | TK            | 22           |

**Table S1. Continued.**

| Kinase            | Kinase family | @0.1 $\mu$ M | Kinase              | Kinase family | @0.1 $\mu$ M |
|-------------------|---------------|--------------|---------------------|---------------|--------------|
| Flt3(h)           | TK            | 10           | ICK(h)              | CMGC          | 105          |
| Flt4(h)           | TK            | 1            | IGF-1R activated(h) | TK            | 101          |
| Fms(h)            | TK            | 21           | IGF-1R(h)           | TK            | 62           |
| Fms(Y969C)(h)     | TK            | 29           | IKK $\alpha$ (h)    | MISC          | 90           |
| Fyn(h)            | TK            | 42           | IKK $\beta$ (h)     | MISC          | 90           |
| GCK(h)            | STE           | 32           | IKK $\epsilon$ (h)  | MISC          | 87           |
| GCN2(h)           | MISC          | 86           | IR activated(h)     | TK            | 72           |
| GRK1(h)           | AGC           | 97           | IR(h)               | TK            | 61           |
| GRK2(h)           | AGC           | 98           | IRAK1(h)            | TKL           | 4            |
| GRK3(h)           | AGC           | 109          | IRAK4(h)            | TKL           | 49           |
| GRK5(h)           | AGC           | 96           | IRE1(h)             | MISC          | 58           |
| GRK6(h)           | AGC           | 93           | IRR(h)              | TK            | 72           |
| GRK7(h)           | AGC           | 93           | Itk(h)              | TK            | 4            |
| GSK3 $\alpha$ (h) | CMGC          | 85           | JAK1(h)             | TK            | 61           |
| GSK3 $\beta$ (h)  | CMGC          | 78           | JAK2(h)             | TK            | 95           |
| haspin(h)         | MISC          | 110          | JAK3(h)             | TK            | 78           |
| Hck activated(h)  | TK            | 16           | JNK1 $\alpha$ 1(h)  | CMGC          | 98           |
| Hck(h)            | TK            | 3            | JNK2 $\alpha$ 2(h)  | CMGC          | 59           |
| HIPK1(h)          | CMGC          | 16           | JNK3(h)             | CMGC          | 78           |
| HIPK2(h)          | CMGC          | 10           | KDR(h)              | TK            | 18           |
| HIPK3(h)          | CMGC          | 7            | Lck activated(h)    | TK            | 5            |
| HIPK4(h)          | CMGC          | 3            | Lck(h)              | TK            | 6            |
| HPK1(h)           | STE           | 4            | LIMK1(h)            | TKL           | 73           |
| HRI(h)            | MISC          | 72           | LIMK2(h)            | TKL           | 32           |

**Table S1. Continued.**

| Kinase         | Kinase family | @0.1 $\mu$ M | Kinase            | Kinase family | @0.1 $\mu$ M |
|----------------|---------------|--------------|-------------------|---------------|--------------|
| LKB1(h)        | CAMK          | 103          | Met(h)            | TK            | 10           |
| LOK(h)         | STE           | 15           | Met(M1268T)(h)    | TK            | 8            |
| LRRK2(h)       | TKL           | 33           | Met(Y1248C)(h)    | TK            | 1            |
| LTK(h)         | TK            | 40           | Met(Y1248D)(h)    | TK            | 0            |
| Lyn(h)         | TK            | 1            | Met(Y1248H)(h)    | TK            | 23           |
| MAK(h)         | CMGC          | 109          | MINK(h)           | STE           | 5            |
| MAP4K3(h)      | STE           | 16           | MKK3(h)           | STE           | 72           |
| MAP4K4(h)      | STE           | 23           | MKK6(h)           | STE           | 92           |
| MAP4K5(h)      | STE           | 0            | MLCK(h)           | CAMK          | 95           |
| MAPK1(h)       | CMGC          | 118          | MLK1(h)           | TKL           | 45           |
| MAPK2(h)       | CMGC          | 99           | MLK2(h)           | TKL           | 25           |
| MAPKAP-K2(h)   | CAMK          | 98           | MLK3(h)           | TKL           | 9            |
| MAPKAP-K3(h)   | CAMK          | 99           | Mnk2(h)           | CAMK          | 26           |
| MARK1(h)       | CAMK          | 104          | MOK(h)            | CMGC          | 107          |
| MARK3(h)       | CAMK          | 103          | MRCK $\alpha$ (h) | AGC           | 101          |
| MARK4(h)       | CAMK          | 103          | MRCK $\beta$ (h)  | AGC           | 99           |
| MEK1 (h)       | STE           | 86           | MRCK $\gamma$ (h) | AGC           | 110          |
| MEK2(h)        | STE           | 23           | MSK1(h)           | AGC           | 50           |
| MEKK2(h)       | STE           | 47           | MSK2(h)           | AGC           | 22           |
| MEKK3(h)       | STE           | 71           | MSSK1(h)          | CMGC          | 131          |
| MELK(h)        | CAMK          | 9            | MST1(h)           | STE           | 42           |
| Mer(h)         | TK            | 1            | MST2(h)           | STE           | 39           |
| Met(D1246H)(h) | TK            | 23           | MST3(h)           | STE           | 81           |
| Met(D1246N)(h) | TK            | 29           | MST4(h)           | STE           | 45           |

**Table S1. Continued.**

| Kinase         | Kinase family  | @0.1 $\mu$ M | Kinase                                            | Kinase family  | @0.1 $\mu$ M |
|----------------|----------------|--------------|---------------------------------------------------|----------------|--------------|
| mTOR(h)        | Lipid/Atypical | 91           | PAR-1B $\alpha$ (h)                               | CAMK           | 99           |
| mTOR/FKBP12(h) | Lipid/Atypical | 94           | PASK(h)                                           | CAMK           | 102          |
| MuSK(h)        | TK             | 82           | PDGFR $\alpha$ (D842V)(h)                         | TK             | 3            |
| MYLK2(h)       | CAMK           | 58           | PDGFR $\alpha$ (h)                                | TK             | 65           |
| MYO3B(h)       | STE            | 36           | PDGFR $\alpha$ (V561D)(h)                         | TK             | 1            |
| NDR2(h)        | AGC            | 70           | PDGFR $\beta$ (h)                                 | TK             | 89           |
| NEK1(h)        | MISC           | 60           | PDHK2(h)                                          | MISC           | 91           |
| NEK11(h)       | MISC           | 63           | PDHK4(h)                                          | MISC           | 117          |
| NEK2(h)        | MISC           | 83           | PDK1(h)                                           | AGC            | 74           |
| NEK3(h)        | MISC           | 94           | PEK(h)                                            | MISC           | 41           |
| NEK4(h)        | MISC           | 6            | PhK $\gamma$ 1(h)                                 | CAMK           | 72           |
| NEK6(h)        | MISC           | 99           | PhK $\gamma$ 2(h)                                 | CAMK           | 90           |
| NEK7(h)        | MISC           | 86           | PI3 Kinase(p110 $\alpha$ (E542K/p85 $\alpha$ )(h) | Lipid/Atypical | 89           |
| NEK9(h)        | MISC           | 10           | PI3 Kinase(p110 $\alpha$ (E545K/p85 $\alpha$ )(h) | Lipid/Atypical | 97           |
| NIM1(h)        | CAMK           | 107          | PI3 Kinase(p110 $\alpha$ /p85 $\alpha$ )(h)       | Lipid/Atypical | 102          |
| NLK(h)         | CMGC           | 82           | PI3 Kinase(p110 $\beta$ /p85 $\alpha$ )(h)        | Lipid/Atypical | 97           |
| NUAK2(h)       | CAMK           | 107          | PI3 Kinase(p110 $\delta$ /p85 $\alpha$ )(h)       | Lipid/Atypical | 99           |
| p70S6K(h)      | AGC            | 3            | PI3 Kinase(p120 $\gamma$ )(h)                     | Lipid/Atypical | 79           |
| PAK1(h)        | STE            | 92           | PI3KC2 $\alpha$ (h)                               | Lipid/Atypical | 100          |
| PAK2(h)        | STE            | 104          | PI3KC2 $\gamma$ (h)                               | Lipid/Atypical | 98           |
| PAK3(h)        | STE            | 101          | Pim-1(h)                                          | CAMK           | 25           |
| PAK4(h)        | STE            | 109          | Pim-2(h)                                          | CAMK           | 82           |
| PAK5(h)        | STE            | 91           | Pim-3(h)                                          | CAMK           | 112          |
| PAK6(h)        | STE            | 126          | PIP4K2 $\alpha$ (h)                               | Lipid/Atypical | 100          |



**Table S1. Continued.**

| Kinase              | Kinase family  | @0.1 $\mu$ M | Kinase        | Kinase family | @0.1 $\mu$ M |
|---------------------|----------------|--------------|---------------|---------------|--------------|
| PIP5K1 $\alpha$ (h) | Lipid/Atypical | 100          | Plk3(h)       | MISC          | 79           |
| PIP5K1 $\gamma$ (h) | Lipid/Atypical | 98           | Plk4(h)       | MISC          | 91           |
| PKA(h)              | AGC            | 86           | PRAK(h)       | CAMK          | 121          |
| PKAcb(h)            | AGC            | 81           | PRK1(h)       | AGC           | 102          |
| PKB $\alpha$ (h)    | AGC            | 97           | PRK2(h)       | AGC           | 93           |
| PKB $\beta$ (h)     | AGC            | 62           | PRKG2(h)      | AGC           | 85           |
| PKB $\gamma$ (h)    | AGC            | 115          | PrKX(h)       | AGC           | 92           |
| PKC $\alpha$ (h)    | AGC            | 107          | PRP4(h)       | CMGC          | 89           |
| PKC $\beta$ I(h)    | AGC            | 95           | PTK5(h)       | TK            | 1            |
| PKC $\beta$ II(h)   | AGC            | 101          | Pyk2(h)       | TK            | 52           |
| PKC $\gamma$ (h)    | AGC            | 99           | Ret(h)        | TK            | 1            |
| PKC $\delta$ (h)    | AGC            | 111          | Ret(V804L)(h) | TK            | 4            |
| PKC $\epsilon$ (h)  | AGC            | 106          | Ret(V804M)(h) | TK            | 2            |
| PKC $\zeta$ (h)     | AGC            | 116          | RIPK1(h)      | TKL           | 7            |
| PKC $\eta$ (h)      | AGC            | 113          | RIPK2(h)      | TKL           | 9            |
| PKC $\theta$ (h)    | AGC            | 98           | ROCK-I(h)     | AGC           | 81           |
| PKC $\iota$ (h)     | AGC            | 111          | ROCK-II(h)    | AGC           | 49           |
| PKC $\mu$ (h)       | AGC            | 89           | Ron(h)        | TK            | 23           |
| PKD2(h)             | CAMK           | 101          | Ros(h)        | TK            | 31           |
| PKD3(h)             | CAMK           | 85           | Rse(h)        | TK            | 9            |
| PKG1 $\alpha$ (h)   | AGC            | 109          | Rsk1(h)       | AGC           | 4            |
| PKG1 $\beta$ (h)    | AGC            | 94           | Rsk2(h)       | AGC           | 19           |
| PKR(h)              | MISC           | 100          | Rsk3(h)       | AGC           | 18           |
| Plk1(h)             | MISC           | 113          | Rsk4(h)       | AGC           | 16           |

**Table S1. Continued.**

| Kinase           | Kinase family | @0.1 $\mu$ M | Kinase           | Kinase family | @0.1 $\mu$ M |
|------------------|---------------|--------------|------------------|---------------|--------------|
| SAPK2a(h)        | CMGC          | 62           | STK32C(h)        | MISC          | 106          |
| SAPK2a(T106M)(h) | CMGC          | 30           | STK33(h)         | CAMK          | 36           |
| SAPK2b(h)        | CMGC          | 18           | Syk(h)           | TK            | 100          |
| SAPK3(h)         | CMGC          | 21           | TAF1L(h)         | MISC          | 93           |
| SAPK4(h)         | CMGC          | 5            | TAK1(h)          | TKL           | 11           |
| SBK1(h)          | MISC          | 111          | TAO1(h)          | STE           | 29           |
| SGK(h)           | AGC           | 108          | TAO2(h)          | STE           | 14           |
| SGK2(h)          | AGC           | 85           | TAO3(h)          | STE           | 32           |
| SGK3(h)          | AGC           | 95           | TBK1(h)          | MISC          | 82           |
| SIK(h)           | CAMK          | 78           | Tec activated(h) | TK            | 102          |
| SIK2(h)          | CAMK          | 107          | TGFBR1(h)        | TKL           | 115          |
| SIK3(h)          | CAMK          | 106          | TGFBR2(h)        | TKL           | 97           |
| SLK(h)           | STE           | 21           | Tie2(h)          | TK            | 4            |
| Snk(h)           | MISC          | 57           | Tie2(R849W)(h)   | TK            | 1            |
| SNRK(h)          | CAMK          | 94           | Tie2(Y897S)(h)   | TK            | -1           |
| Src(1-530)(h)    | TK            | 18           | TLK1(h)          | MISC          | 103          |
| Src(T341M)(h)    | TK            | 19           | TLK2(h)          | MISC          | 95           |
| SRMS(h)          | TK            | 51           | TNIK(h)          | STE           | 2            |
| SRPK1(h)         | CMGC          | 100          | TRB2(h)          | CAMK          | 58           |
| SRPK2(h)         | CMGC          | 115          | TrkA(h)          | TK            | 1            |
| STK16(h)         | MISC          | 94           | TrkB(h)          | TK            | -3           |
| STK25(h)         | STE           | 25           | TrkC(h)          | TK            | 0            |
| STK32A(h)        | MISC          | 102          | TSSK1(h)         | CAMK          | 92           |
| STK32B(h)        | MISC          | 101          | TSSK2(h)         | CAMK          | 107          |

**Table S1. Continued.**

| Kinase   | Kinase family | @0.1 $\mu$ M | Kinase    | Kinase family | @0.1 $\mu$ M |
|----------|---------------|--------------|-----------|---------------|--------------|
| TSSK3(h) | CAMK          | 103          | VRK2(h)   | CK1           | 90           |
| TSSK4(h) | CAMK          | 105          | Wee1(h)   | MISC          | 95           |
| TTBK1(h) | CK1           | 98           | Wee1B(h)  | MISC          | 99           |
| TTBK2(h) | CK1           | 97           | WNK1(h)   | MISC          | 93           |
| TTK(h)   | MISC          | 1            | WNK2(h)   | MISC          | 76           |
| Txk(h)   | TK            | 85           | WNK3(h)   | MISC          | 81           |
| TYK2(h)  | TK            | 93           | WNK4(h)   | MISC          | 93           |
| ULK1(h)  | MISC          | 99           | Yes(h)    | TK            | 13           |
| ULK2(h)  | MISC          | 103          | ZAK(h)    | TKL           | 14           |
| ULK3(h)  | MISC          | 35           | ZAP-70(h) | TK            | 90           |
| VRK1(h)  | CK1           | 88           |           |               |              |

**Table S2. IC<sub>50</sub> Values of Compounds **9a**-**ae** and **13a**-**h** in RS4;11 Cell**

| Compd     | IC <sub>50</sub> , nM | Compd      | IC <sub>50</sub> , nM |
|-----------|-----------------------|------------|-----------------------|
| <b>9a</b> | > 1000                | <b>9u</b>  | > 1000                |
| <b>9b</b> | > 1000                | <b>9v</b>  | > 1000                |
| <b>9c</b> | > 1000                | <b>9w</b>  | > 1000                |
| <b>9d</b> | > 1000                | <b>9x</b>  | > 1000                |
| <b>9e</b> | > 1000                | <b>9y</b>  | > 1000                |
| <b>9f</b> | > 1000                | <b>9z</b>  | > 1000                |
| <b>9g</b> | > 1000                | <b>9aa</b> | > 1000                |
| <b>9h</b> | > 1000                | <b>9ab</b> | > 1000                |
| <b>9i</b> | > 1000                | <b>9ac</b> | > 1000                |
| <b>9j</b> | > 1000                | <b>9ad</b> | > 1000                |

|           |        |            |        |
|-----------|--------|------------|--------|
| <b>9k</b> | > 1000 | <b>9ae</b> | > 1000 |
| <b>9l</b> | > 1000 | <b>13a</b> | > 1000 |
| <b>9m</b> | > 1000 | <b>13b</b> | > 1000 |
| <b>9n</b> | > 1000 | <b>13c</b> | > 1000 |
| <b>9o</b> | > 1000 | <b>13d</b> | > 1000 |
| <b>9p</b> | > 1000 | <b>13e</b> | > 1000 |
| <b>9q</b> | > 1000 | <b>13f</b> | > 1000 |
| <b>9r</b> | > 1000 | <b>13g</b> | > 1000 |
| <b>9s</b> | > 1000 | <b>13h</b> | > 1000 |
| <b>9t</b> | > 1000 |            |        |

**Table S3.** Inhibitory Rate of Compounds **9a-ae** and **13a-h** in HL-60 Cell

| <b>Compd</b> | <b>Inhibitory rate (%)</b> | <b>Compd</b> | <b>Inhibitory rate (%)</b> |
|--------------|----------------------------|--------------|----------------------------|
| <b>9a</b>    | 9.6                        | <b>9u</b>    | -2.4                       |
| <b>9b</b>    | 12.8                       | <b>9v</b>    | -9.0                       |
| <b>9c</b>    | 8.7                        | <b>9w</b>    | -10.4                      |
| <b>9d</b>    | -1.1                       | <b>9x</b>    | 12.2                       |
| <b>9e</b>    | 4.0                        | <b>9y</b>    | -10.6                      |
| <b>9f</b>    | 8.8                        | <b>9z</b>    | -8.7                       |
| <b>9g</b>    | -12.6                      | <b>9aa</b>   | 0.9                        |
| <b>9h</b>    | 3.5                        | <b>9ab</b>   | 3.1                        |
| <b>9i</b>    | 4.2                        | <b>9ac</b>   | -3.4                       |

|           |       |            |       |
|-----------|-------|------------|-------|
| <b>9j</b> | 8.4   | <b>9ad</b> | -9.8  |
| <b>9k</b> | 4.4   | <b>9ae</b> | -2.9  |
| <b>9l</b> | -17.7 | <b>13a</b> | 7.6   |
| <b>9m</b> | -8.5  | <b>13b</b> | 7.3   |
| <b>9n</b> | 14.8  | <b>13c</b> | 5.8   |
| <b>9o</b> | 12.3  | <b>13d</b> | -0.9  |
| <b>9p</b> | 12.1  | <b>13e</b> | -10.6 |
| <b>9q</b> | 5.3   | <b>13f</b> | 2.6   |
| <b>9r</b> | -1.8  | <b>13g</b> | 0.4   |
| <b>9s</b> | 10.6  | <b>13h</b> | -2.4  |
| <b>9t</b> | -7.4  |            |       |

**Table S4.** IC<sub>50</sub> Values against Hit Target Kinases of **9u**<sup>a</sup>

| <b>Target</b>     | <b>IC<sub>50</sub>, nM</b> | <b>Target</b>                          | <b>IC<sub>50</sub>, nM</b> |
|-------------------|----------------------------|----------------------------------------|----------------------------|
| <b>Abl(T315I)</b> | 3                          | <b>LOK</b>                             | 4                          |
| <b>Aurora-B</b>   | 6                          | <b>Lyn</b>                             | 1                          |
| <b>c-Kit</b>      | > 300                      | <b>Mer</b>                             | 0.7                        |
| <b>FGFR1</b>      | 3                          | <b>Met</b>                             | 15                         |
| <b>FGFR2</b>      | 4                          | <b>PDGFR<math>\alpha</math>(D842V)</b> | 10                         |
| <b>FGFR3</b>      | 13                         | <b>PDGFR<math>\alpha</math>(V561D)</b> | 2                          |
| <b>FGFR4</b>      | 46                         | <b>Ret</b>                             | 6                          |
| <b>Flt1(h)</b>    | 5                          | <b>Rsk1</b>                            | 4                          |
| <b>Flt3(h)</b>    | 7                          | <b>Tie2</b>                            | 15                         |
| <b>Flt4(h)</b>    | 4                          | <b>Lck</b>                             | 12                         |
| <b>HCK</b>        | 4                          |                                        |                            |

<sup>a</sup> IC<sub>50</sub> values for enzymatic inhibition of FLT3 kinase; data are expressed from the

dose-response curves of at least two independent experiments.

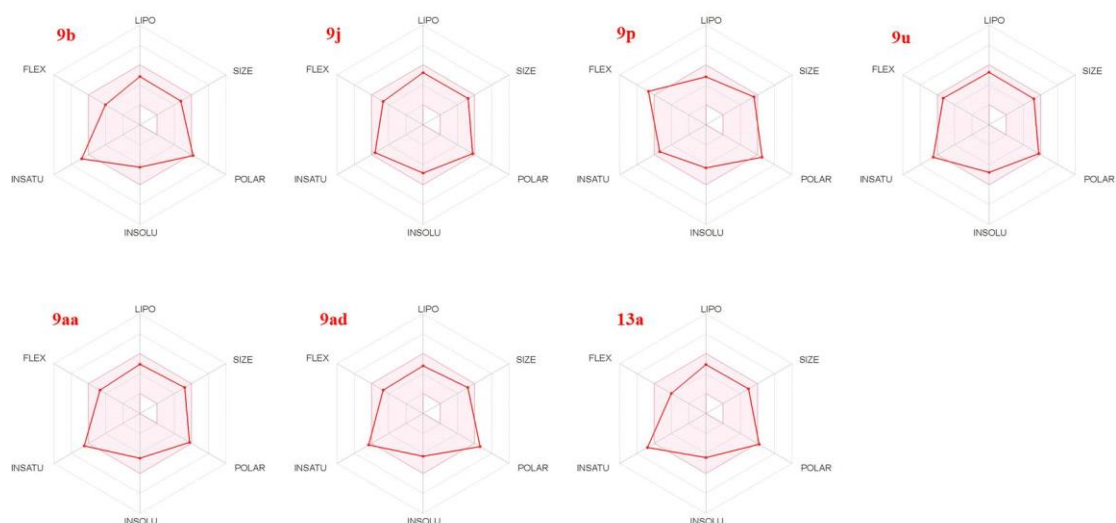

**Figure S1.** Bioavailability radar chart from *swissADME* online web tool for tested compounds. The pink area represents the range of the optimal property values for oral bioavailability and the red line is tested compounds predicted properties.

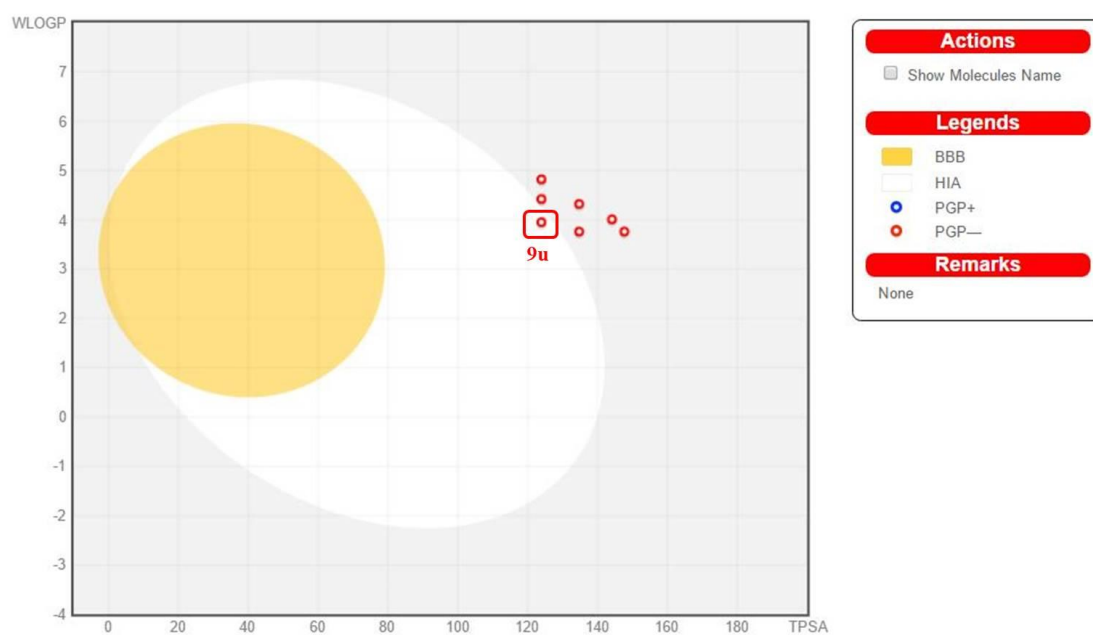

**Figure S2.** Predicted Boiled-Egg plot from *swissADME* online web tool for tested compounds (9b, 9j, 9p, 9u, 9aa, 9ad, 13a).

## Biological Assay Methods

**Anti-proliferative Assays.** MV4-11 and Molm-13 cells were cultured in IMDM (Gibco, Milano, Italy) contained 10% fetal bovine serum (FBS) (Invitrogen, Milano, Italy). BaF3-ITD, BaF3-ITD-D835V, BaF3-ITD-F691L were cultured in RPMI (Gibco, Milano, Italy) contained 10% fetal bovine serum (FBS) (Invitrogen, Milano, Italy) and 800 µg/mL neomycin sulfate. All media contained 100 units/mL penicillin (Gibco, Milano, Italy), and 100 µg/mL streptomycin (Gibco, Milano, Italy). Cells were incubated at 37 °C in a humidified atmosphere of 5% CO<sub>2</sub>. Cells in logarithmic phase were seeded into 96-well culture plates at densities of (10000-20000) cells per well. Then cells were treated with various concentrations of compounds for 72 h in final volumes of 200 µL. Upon end point, 20 µL MTT (5 mg/mL) was added to each well, and the cells were incubated for an additional 1-4 h. After treatment with 20% SDS overnight, absorbance values at a wavelength of 570 nM were taken on a spectrophotometer (Molecular Devices, Sunnyvale, USA). IC<sub>50</sub> values were calculated using percentage of growth versus untreated control. The data were finally fitted in GraphPad Prism V6.0 software to obtain IC<sub>50</sub> values using equation ( $Y = \text{Bottom} + (\text{Top} - \text{Bottom}) / (1 + 10^{((\text{LogIC}_{50} - X) * \text{Hill Slope}))}$ ), Y is %inhibition and X is compound concentration.).

**Kinase Profile Assay and IC<sub>50</sub> Test.** Kinase profiling was carried out by Eurofins Discovery Pharma Services (UK) according to the published protocols. The kinases activity of 0.1 µM **9u** on 422 kinases involved in tumor regulation in vitro were measured by radiometric assays. Briefly, each kinase was incubated with 0.1 µM **9u**



in indicated reaction solutions contained [ $\gamma$ - $^{33}\text{P}$ -ATP] and other reagents such as MOPS, EDTA, EAIYAAPFAKKK, Magnesium acetate and so on (different pH, concentrations and activities according to the specific needs of different kinases). The reaction is initiated by the addition of the Mg(n)/ATP mix. After incubation for a while (specific time as required) at room temperature, the reaction is stopped by the addition of phosphoric acid to a concentration of 0.5%. 10  $\mu\text{L}$  of the stopped reaction is spotted onto a P30 filtermat and washed four times for 4 minutes in 0.425% phosphoric acid and once in methanol prior to drying and scintillation counting. The in vitro kinase enzymatic inhibition assays were carried out by the Kinase Profiling Services provided by Eurofins (UK). The detailed protocol descriptions can be provided at the website (<https://www.eurofinsdiscoveryservices.com>).

**Dissociation Constants ( $K_d$ ) Assay for FLT3 Mutants.** The kinase binding constants assay was conducted using the Kinomescan platform. Kinase-tagged T7 phage or DNA was expressed in *E. coli* host or HEK-293 cells. Binding reactions were assembled by kinases, ligand affinity beads, and test compounds with shaking for 1 h at room temperature, then measured by qPCR. Kinome profile assays were shown as percent of control, and  $K_d$  values were determined by 6-point 10-fold serial dilution of each test compound in this method. The detailed protocol description can be provided at the website (<https://www.discoverx.com>).

**Western Blotting of Signaling Pathways.** The cells were treated with the compounds at the indicated concentrations. Then the cells were collected and total proteins were extracted with RIPA Lysis Buffer (beyotime Co. P0013B, components: 50 mM Tris,

pH 7.4, 150 mM NaCl, 1% Triton X-100, 1% sodium deoxycholate, 0.1% SDS, 1 mM sodium orthovanadate, sodium fluoride, EDTA and leupeptin). The protein concentration was measured by the BCA Protein assay (ThermoScientific, USA). Equivalent samples (30 µg of protein) were subjected to SDS-PAGE, and then the proteins were transferred onto PVDF membranes (Millipore, USA). After blocking by 5% non-fat milk for 2 h at room temperature, the membranes were incubated with the indicated primary antibodies at 4 °C overnight and subsequently probed by the appropriate secondary antibodies conjugated to horseradish peroxidase for 1 h. Immunoreactive bands were visualized using enhanced chemiluminescence (MiniChemi, Sagecreation, Beijing). The molecular sizes of the proteins detected were determined by comparison with pertained protein markers (ThermoScientific, USA). Image J v1.8.0 software was used to conduct gray analysis and according to the protocol provided by corporation.

**Cell Cycle Progression Experiment.** Six-well plates were used for MV4-11 and Molm-13 cells culture. All cells were treated with increasing concentrations of the indicated compound. Cells were harvested after 24 h post-treatment, washed in phosphate buffered saline (PBS), and fixed in ice cold 75% ethanol for at least 24 h. The fixed cells were then washed with PBS and stained with propidium iodide (50 µg/mL) in the presence of 1 mg/mL RNase A, 0.5% Triton X-100 for 15 min at room temperature. The stained cells were then analyzed using a FACScan (BD Biosciences) and the resulting data analyzed with cell cycle analysis software (Modfit, BD).

**Annexin V-FITC/PI Apoptosis Assay.** Six-well plates were used for cells culture. MV4-11 and Molm-13 cells were treated with compound **9u** at gradient increase from 1 to 1000 nM for 48 h. Cells were washed with PBS for twice and collected to stain with an Annexin V/PI Apoptosis Detection kit (Invitrogen) according to the manufacturer's instructions. Finally, the stained cells were subjected to flow cytometry for analysis in 15 min, and 20,000 cells for each sample were examined (Attune NxT, AFC2, Life Technologies Corporation).

**Pharmacokinetic Study.** A 1 mg/mL dosing solution of **9b**, **9p**, **9j**, **9u**, **9aa**, **9ad**, and **13a** was respectively prepared by dissolving in physiological saline containing 2% DMSO, 2% PEG-400, 10% cyclodextrin with the pH adjusted to 5~6 for po or iv administration. Six SD rats, weighing 200–250 g each, were obtained from Beijing HFK Bioscience Co. Ltd. Each tested compound was separately administered intravenously (5 mg/kg dose) or orally (5 mg/kg) to a group of six rats per time. At time points 0 (prior to dosing), 5 min, 15 min, 30 min, 45 min, 1 h, 2 h, 4 h, 6 h, 8 h, 10 h, 12 h, and 24 h after dosing, a blood sample was collected from each animal via cardiac puncture and stored in ice (0–4 °C). Plasma was separated from the blood by centrifugation (4000 g for 15 min at 4 °C) and stored in a freezer at – 80 °C. All samples were analyzed for the tested compound by LC–MS/MS (Waters Acquity UPLC system; Waters Quattro Premier XE). Data were acquired via monitoring of multiple reactions. Plasma concentration data were analyzed by a standard noncompartmental method.

**Molecular Docking Study.** The molecular structures of compounds were constructed

using Chemoffice software and saved as SDF format files. Then the molecular structures of compounds were added hydrogen, adjusted pH state, generated isomers and loaded OPLS3 force field to generate 3D conformation by using the Ligparep module in Schrodinger software package. The receptor protein FLT3 (PDB: 4XUF) was pretreated with the protein preparation wizard module of the Schrodinger software package, including adding hydrogen, repairation of missing residues, equilibrium charge, adjustment of unreasonable atomic overlap, and so on. And then the compound molecule was docked into the active site of FLT3 protein, and the best conformation and pose were remained.

**Animal Tumor Models and Treatment.** To establish the MV4-11 and Molm-13 xenograft models, MV4-11 or Molm-13 cells ( $10^7$  cells in 100  $\mu$ L serum-free IMDM) were injected subcutaneously into the right flanks of 5-6 weeks old female NOD/SCID mice. When the size of the formed xenografts reached 300 - 500 mm<sup>3</sup>, the mice were randomly divided (6 mice per group). In these two models, the mice in the experimental group received po administration (1, 3, 10 mg/kg, dissolved in physiological saline containing 2% DMSO, 2% PEG-400, 10% cyclodextrin with the pH adjusted to 5~6) of **9u** per day. Those in the quizartinib group (positive control) received po treatment (3 mg/kg, dissolved in physiological saline containing 2% DMSO, 2% PEG-400, 10% cyclodextrin with the pH adjusted to 5~6) per day. Tumor burden was measured every 2 days by a caliper. Tumor volume (TV) was calculated using the following formula:  $TV = \text{length} \times \text{width}^2 \times 0.5$ . At the end of the experiment, mice were sacrificed and tumors were collected and weighed. The animal studies were

conducted in conformity with institutional guide for the care and use of laboratory animals, and all mouse protocols were approved by the Animal Care and Use Committee of Sichuan University (Chengdu, Sichuan, China).
